# Supplementary material for: Cyanocobalamin conjugates of cisplatin and diaminocyclohexane-platinum(ii): matrix-assisted laser desorption ionization mass spectrometry characterization using 4-chloro-α-cyanocinnamic acid as the matrix
Source: Royal Society of Chemistry journal article supplement (doi:10.1039/c7ra08588e), 2017-01-01
Supplement: c7ra08588e1.pdf [file c7ra08588e1.pdf]

Running title: *MALDI-MS of cyanocobalamin-platinum conjugates*

**Supplemental Data** as noted in the text

**Cyanocobalamin conjugates of cisplatin and diaminocyclohexane-platinum(II): a matrix-assisted laser desorption ionization mass spectrometry characterization using 4-chloro- $\alpha$ -cyanocinnamic acid as the matrix**

G. Ventura<sup>a</sup>, F. Arnesano<sup>a,b</sup>, C.D. Calvano<sup>a,b</sup>, F. Palmisano<sup>a,b</sup>, T.R.I. Cataldi<sup>\*a,b</sup>,

<sup>a</sup>*Dipartimento di Chimica and* <sup>b</sup>*Centro Interdipartimentale SMART, Università degli Studi di Bari Aldo Moro, via Orabona 4, 70126 Bari (Italy)*

Number of Figures: 3

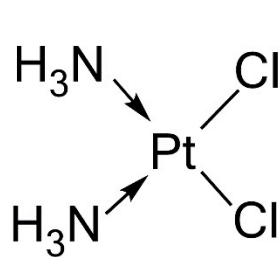

cisplatin

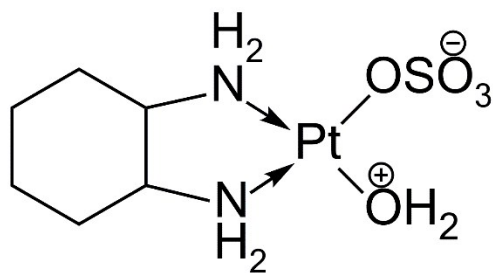

sulfoaquo-1,2-diaminocyclohexanePt(II)

**Figure S1.** Chemical structures of cisplatin and sulfoaquo-1,2-diaminocyclohexaneplatinum(II).

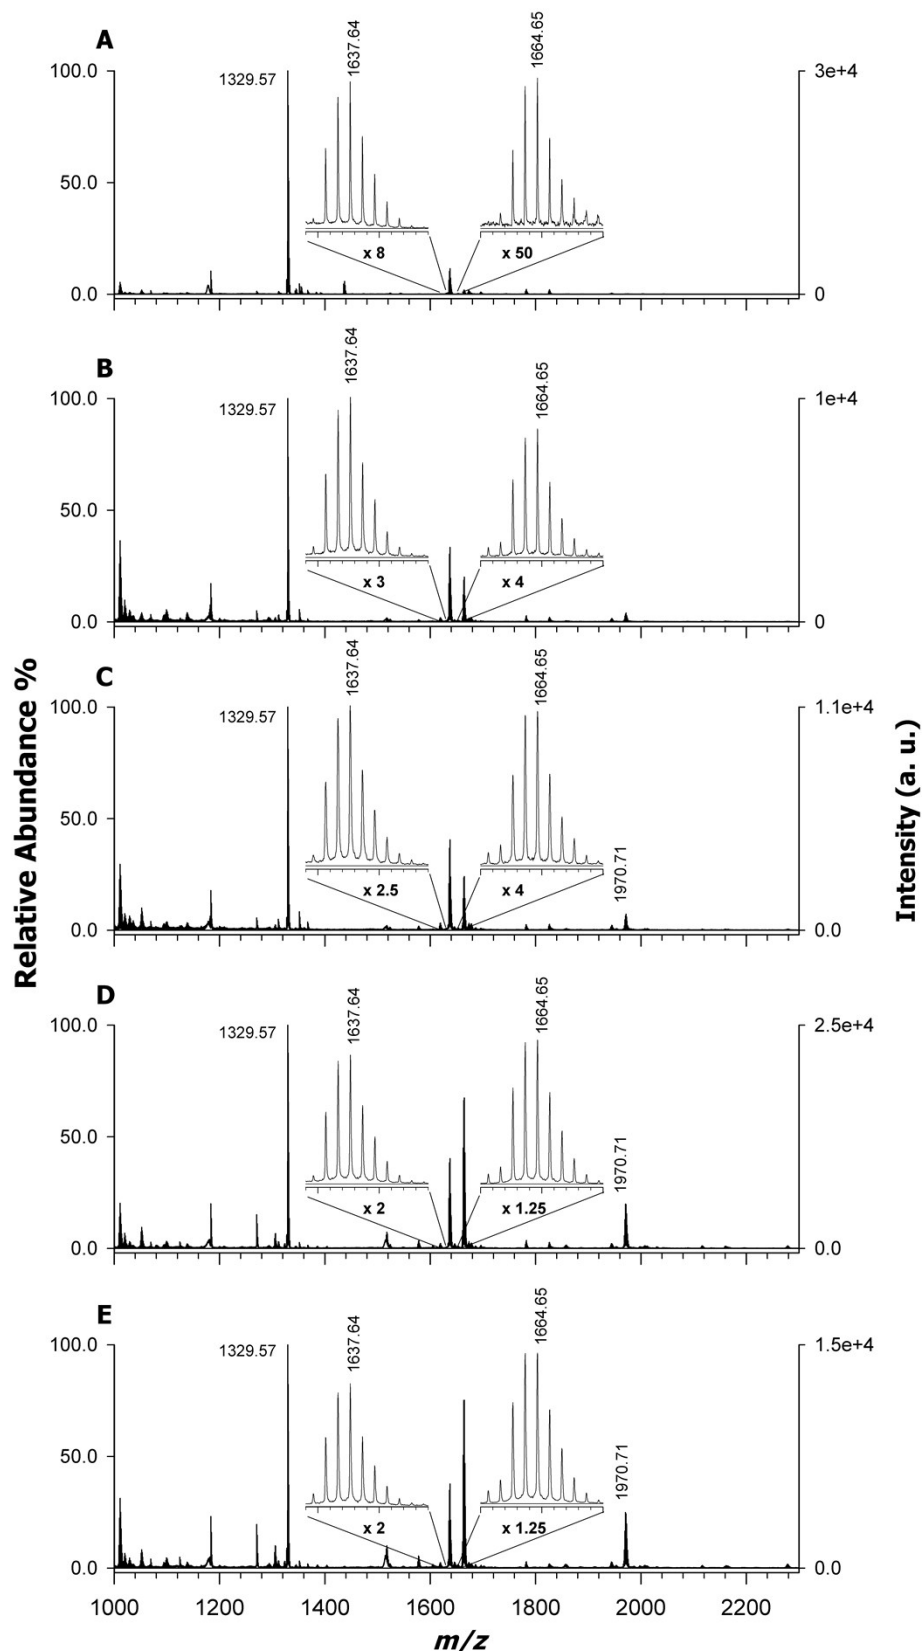

**Figure S2.** MALDI-ToF mass spectra using CCICA matrix of the adduct formed between *CNCbl* and  $\text{Pt}^{\text{II}}(R,R\text{-DACH})$  at increasing reaction time: (A) 0 h, (B) 2 h, (C) 4 h, (D) 8 h and (E) 16 h. The expanded view of peaks at  $m/z$  1637.64 and 1664.65 is shown in each inset.

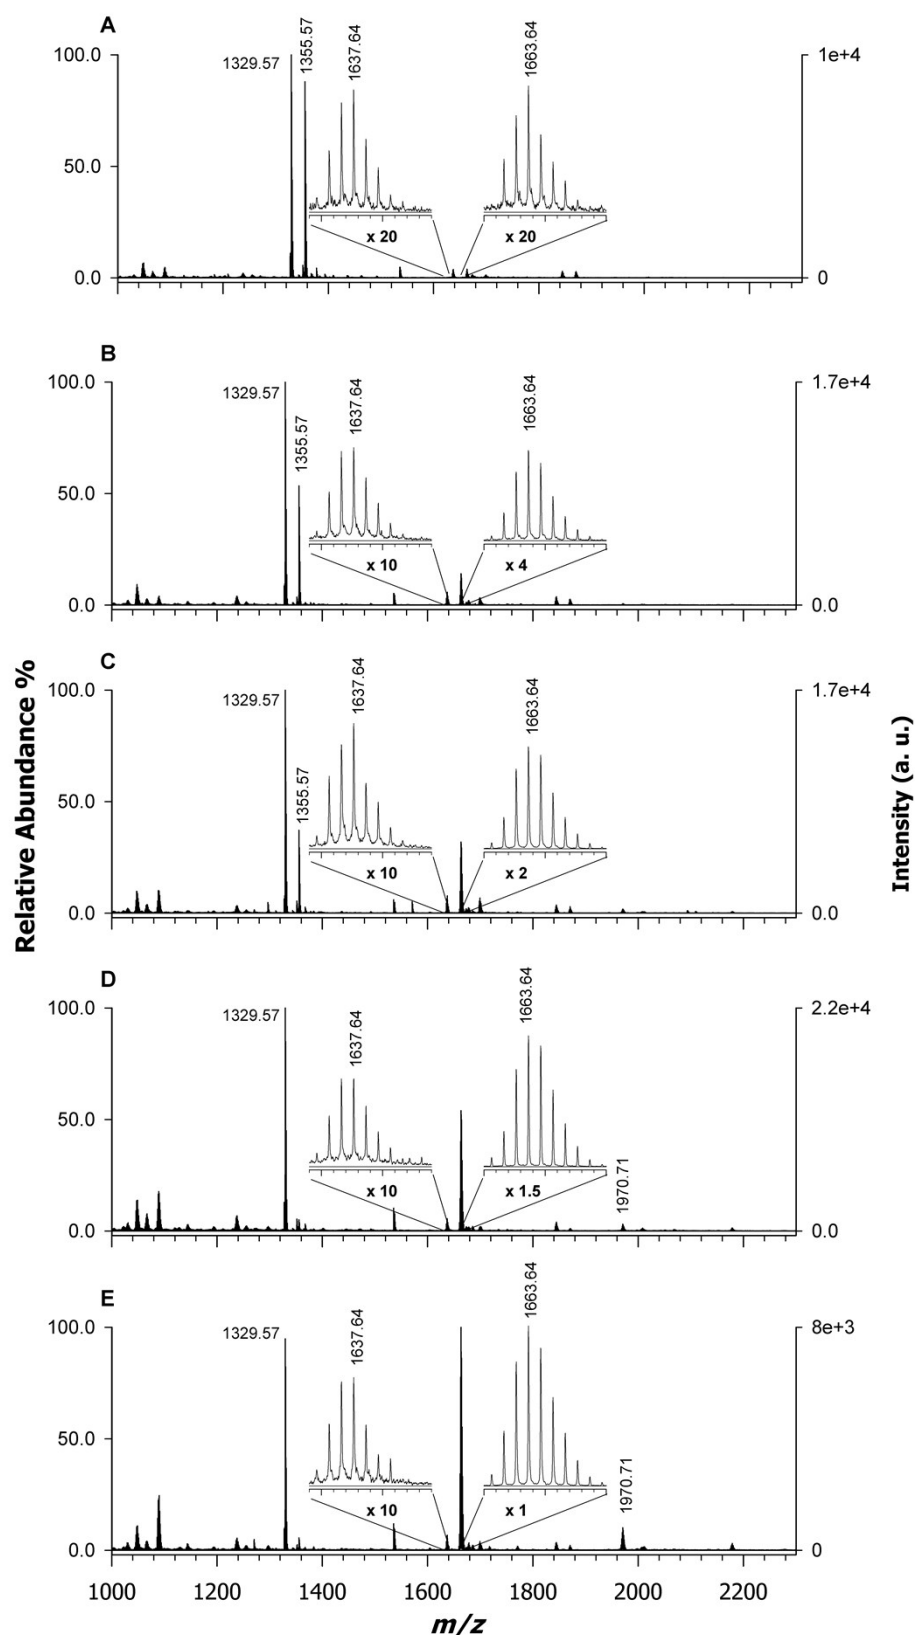

**Figure S3.** MALDI-ToF mass spectra using CHCA matrix of the adduct formed between *CNCbl* and Pt<sup>II</sup>(*R,R*-DACH) at increasing reaction time: (A) 0 h, (B) 2 h, (C) 4 h, (D) 8 h and (E) 16 h. The expanded view of peaks at  $m/z$  1637.64 and 1663.64 is shown in each inset.
